# Supplementary material
Source: Royal Society of Chemistry journal article supplement (doi:10.1039/d6ta01403h)
Supplement: d6ta01403h1.pdf [file d6ta01403h1.pdf]

## **Electrochemical-assisted triple oxidation strategy to efficiently extract lithium from spent LiFePO<sub>4</sub>**

Qiyue Wang,<sup>a,b</sup> Changkun Gao,<sup>a,b</sup> Xinyuan Zhang,<sup>\*,b</sup> Feiyang Zhan,<sup>a,b</sup> Haimin Zhang<sup>\*,a,b</sup> and Huijun Zhao<sup>a,b</sup>

a Science Island Branch of Graduate School, University of Science and Technology of China, Hefei, 230026, P. R. China.

b Anhui Key Laboratory of Nanomaterials and Nanotechnology, Centre for Resource Innovation, Institute of Solid State Physics, HFIPS, Chinese Academy of Sciences, Hefei, 230031, P. R. China.

\* Email address: zhanghm@issp.ac.cn (H. Zhang), xyzhang@issp.ac.cn (X. Zhang), Tel: +86-551-65591973. Fax: +86-551-65591434.

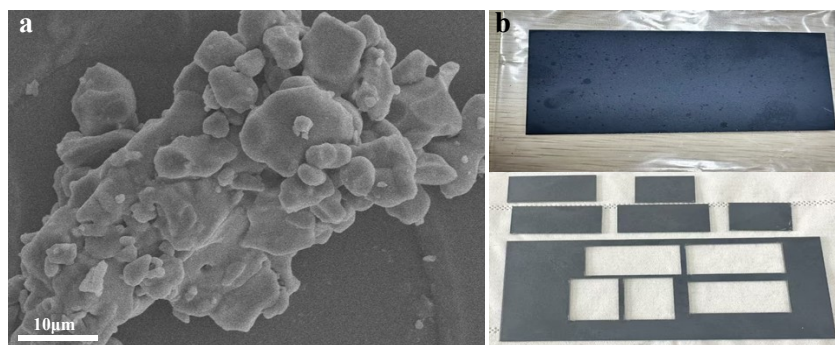

**Fig. S1** (a) SEM image of as-fabricated  $\text{Ti}_4\text{O}_7$  powder. (b) Photo of as-fabricated  $\text{Ti}_4\text{O}_7$  electrode.

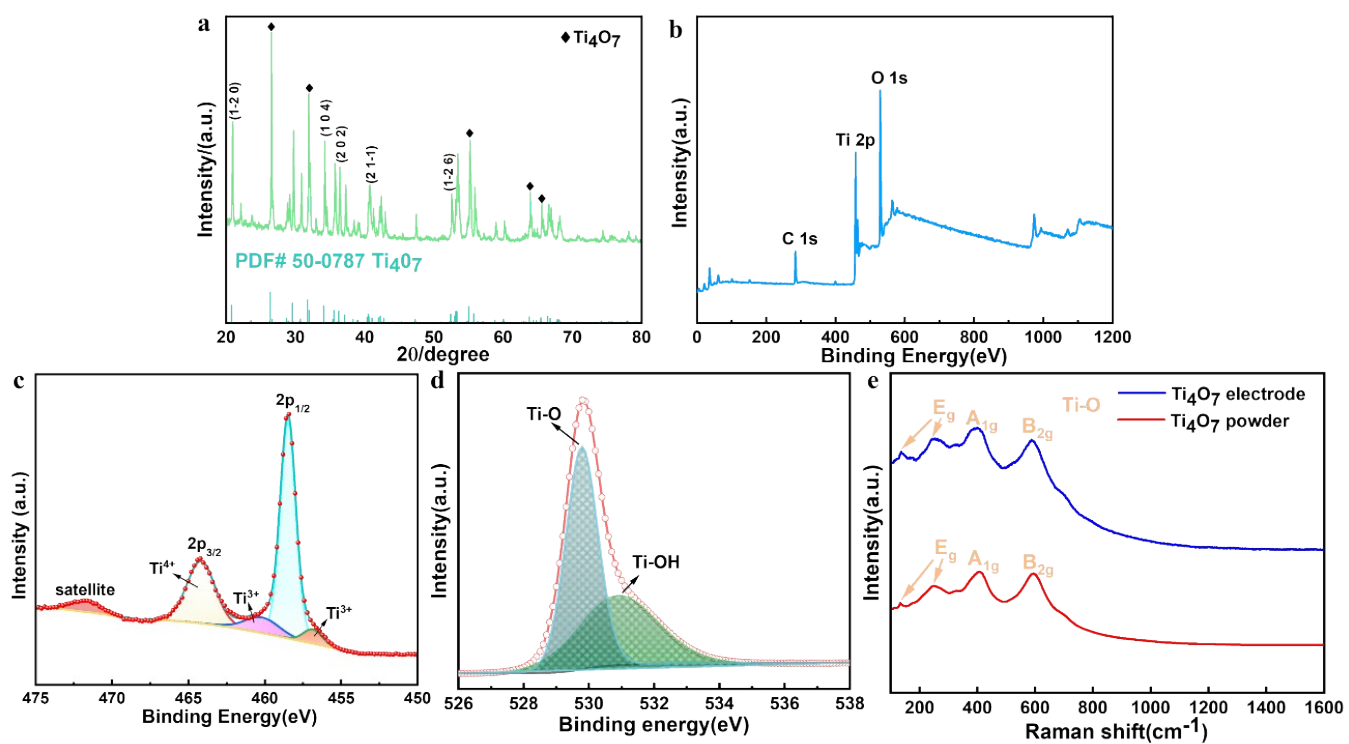

**Fig. S2** (a) XRD patterns. (b) High resolution XPS survey, (c) Ti 2p, and (d) O 1 s spectrum of  $\text{Ti}_4\text{O}_7$  electrode. (e) Raman spectra of  $\text{Ti}_4\text{O}_7$  powder and electrode.

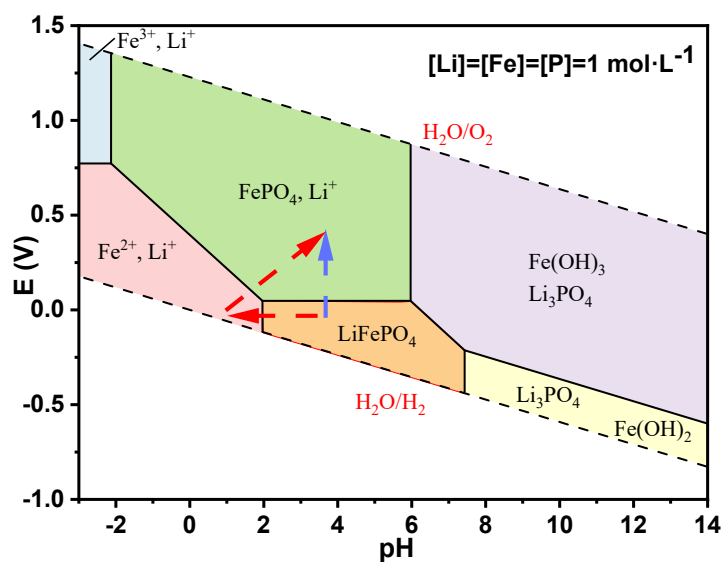

**Fig. S3** Eh-pH phase diagram of Li-Fe-P-H<sub>2</sub>O system.

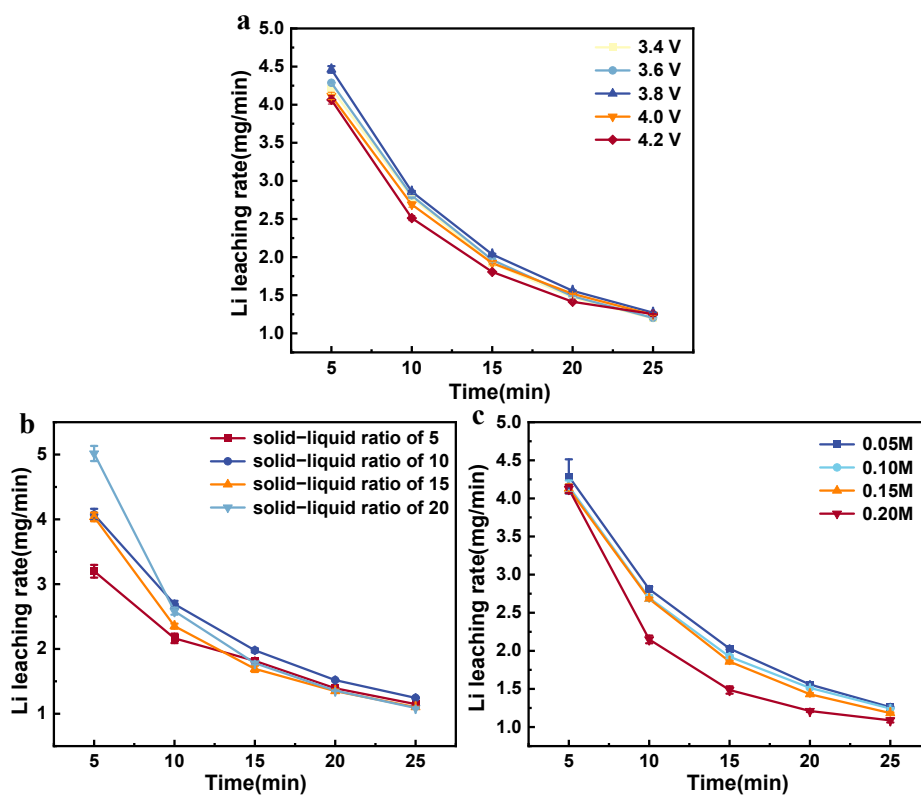

**Fig. S4** (a) Comparison of lithium leaching via electrochemical-assisted leaching under different voltages, (b) Different solid-liquid ratios and (c) different electrolyte concentrations.

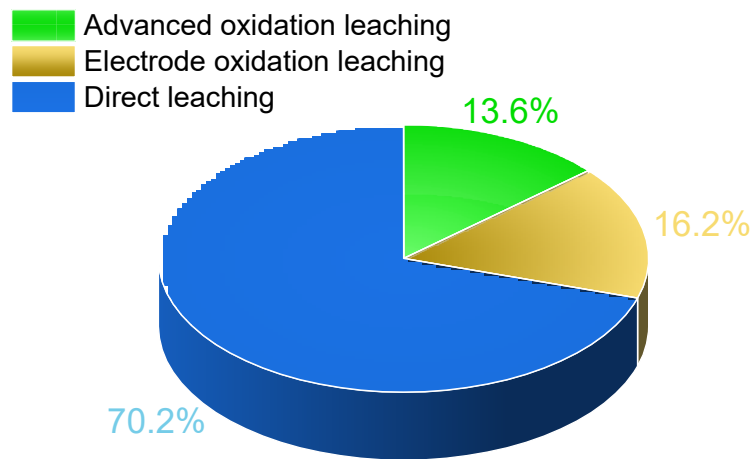

**Fig. S5** Proportion of each part in the electrochemical assisted leaching system.

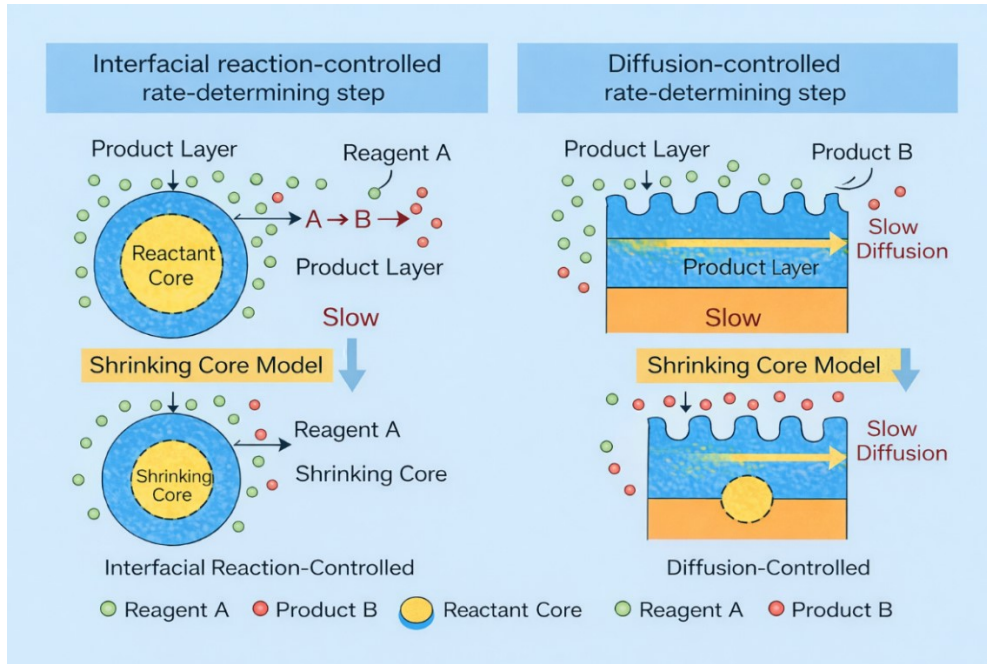

**Fig. S6** Schematic diagram of shrinking core model.

The fundamental premise of this model is that solid particles are leached progressively from the outer surface towards the interior. As a result, the unreacted core diminishes continuously with the product layer growing gradually. Based on the distinct controlling steps, two typical kinetic equations can be deduced from the SCM.<sup>64</sup>

When the interfacial chemical reaction is the rate-controlling step, the relationship between the conversion rate “x” and time “t” can be expressed as **Eq. S1**:

$$1 - (1 - x)^{\frac{1}{3}} = kt \quad (1)$$

Among them, “k” denotes the apparent rate constant. This equation reveals that the conversion “x” increases in an approximately linear manner with time “t”, reflecting the decisive influence of interfacial reaction rate on the overall leaching process.

In the case where the diffusion within product layer constitutes the rate-determining step, the kinetic equation is given by **Eq. S2**:

$$1 - \frac{2}{3}x - (1 - x)^{\frac{2}{3}} = kt \quad (2)$$

This expression indicates that the conversion rate gradually slows down as time increases, which is in line with the characteristics of a diffusion-controlled process. This expression indicates that the conversion “x” gradually slows down as time “t” increases, which is in line with the characteristics of a diffusion-controlled process. However, when neither of the two models is applicable, a third model, the hybrid control model is introduced. The kinetic equation is given by **Eq. S3**:

$$\frac{1}{3} * \ln(1-x) - 1 + (1-x)^{\frac{1}{3}} = kt \quad (3)$$

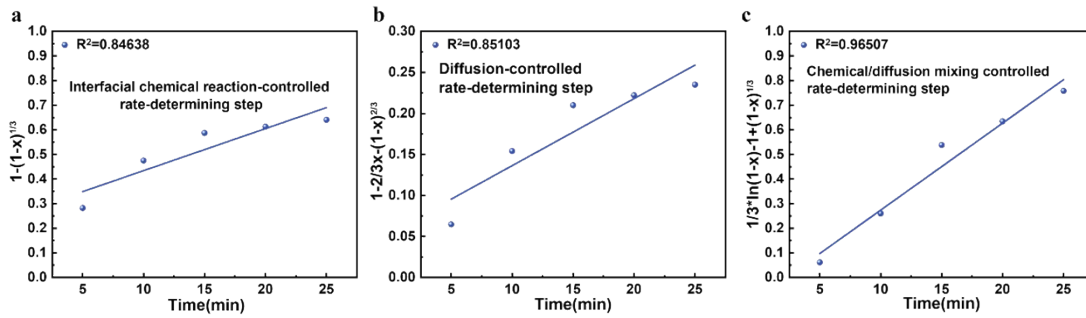

**Fig. S7** (a) Chemical reaction rate control model fitting, (b) Diffusion control model fitting and (c) Chemical/ diffusion mixing controlled fitting by core shrinkage model.

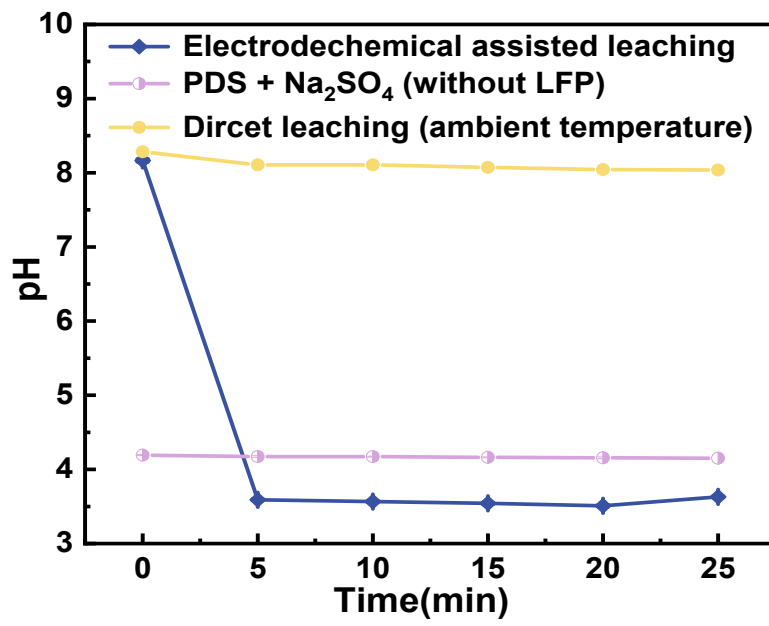

Fig. S8 pH images under different conditions.

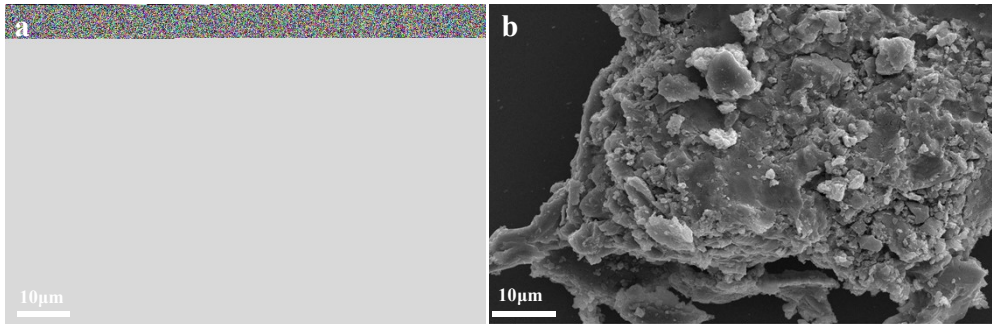

**Fig. S9** (a) The Ti<sub>4</sub>O<sub>7</sub> electrode before (a) and after (b) the reaction

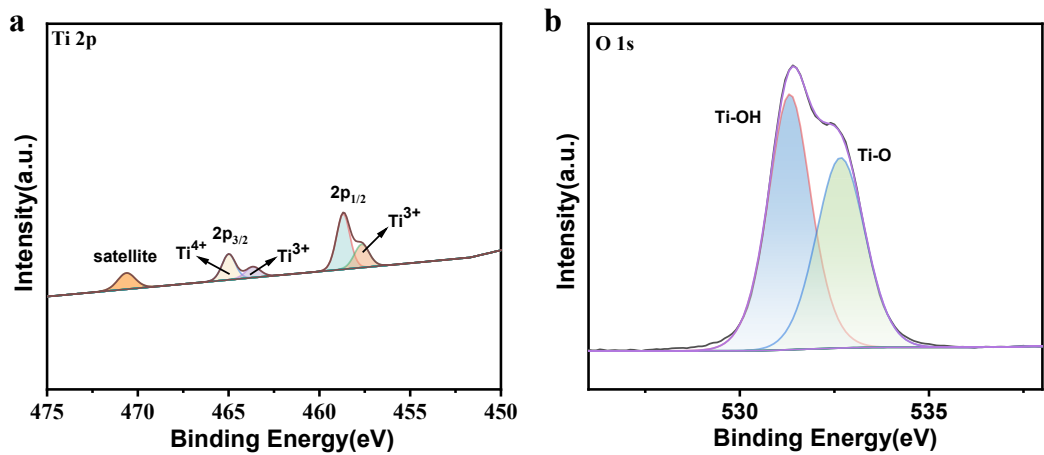

**Fig. S10** High resolution XPS survey, (c) Ti 2p, and (d) O 1 s spectrum of  $Ti_4O_7$  electrode after the reaction

**Table. S1** ICP analysis (Ti dissolution) of the electrolyte under ten-cycle experiments

| <b>ELEM</b> | <b>Avg</b> | <b>Units</b> |
|-------------|------------|--------------|
| Ti          | 0.000366   | ppm          |
| Ti          | 0.000120   | ppm          |
| Ti          | 0.000800   | ppm          |
| Ti          | 0.000320   | ppm          |
| Ti          | 0.000238   | ppm          |
| Ti          | 0.000170   | ppm          |
| Ti          | 0.000183   | ppm          |
| Ti          | 0.000170   | ppm          |
| Ti          | 0.000220   | ppm          |
| Ti          | 0.000112   | ppm          |
